# Supplementary material
Source: publisher site journal article supplement (https://www.dovepress.com/article/430693)
Supplement: Supplementary file 1 [file get_supplementary_file.php]

**Supplementary Information**

Accumulation of iron oxide-based contrast agents in rabbit atherosclerotic plaques in relation to plaque age and vulnerability features.

Alexander Sekita1, Harald Unterweger1, Sonja Berg1, Sabine Ohlmeyer2, Tobias Bäuerle3, Kang H. Zheng4, Bram F Coolen5, Aart J. Nederveen6, Claudia Cabella7, Silvia Rossi7, Erik S.G. Stroes4, Christoph Alexiou1, Stefan Lyer1*, Iwona Cicha1*

1 ENT-Department, Section of Experimental Oncology und Nanomedicine (SEON), Else Kröner-Fresenius-Stiftung-Professorship, Universitätsklinikum Erlangen, Erlangen, Germany

2 Institute of Radiology, Universitätsklinikum Erlangen, Erlangen, Germany

3 Preclinical Imaging Platform Erlangen (PIPE), Universitätsklinikum Erlangen, Erlangen, Germany

4 Department of Vascular Medicine, Amsterdam University Medical Center, University of Amsterdam, Amsterdam, the Netherlands

5 Department of Biomedical Engineering and Physics, Amsterdam University Medical Center, University of Amsterdam, Amsterdam, The Netherlands

6 Department of Radiology and Nuclear Medicine, Amsterdam University Medical Center, University of Amsterdam, Amsterdam, the Netherlands

7 Bracco Imaging SpA, Centro Ricerche Bracco, Colleretto Giacosa, Turin, Italy

Stefan Lyer1*

Iwona Cicha1*
*These authors contributed equally to this work


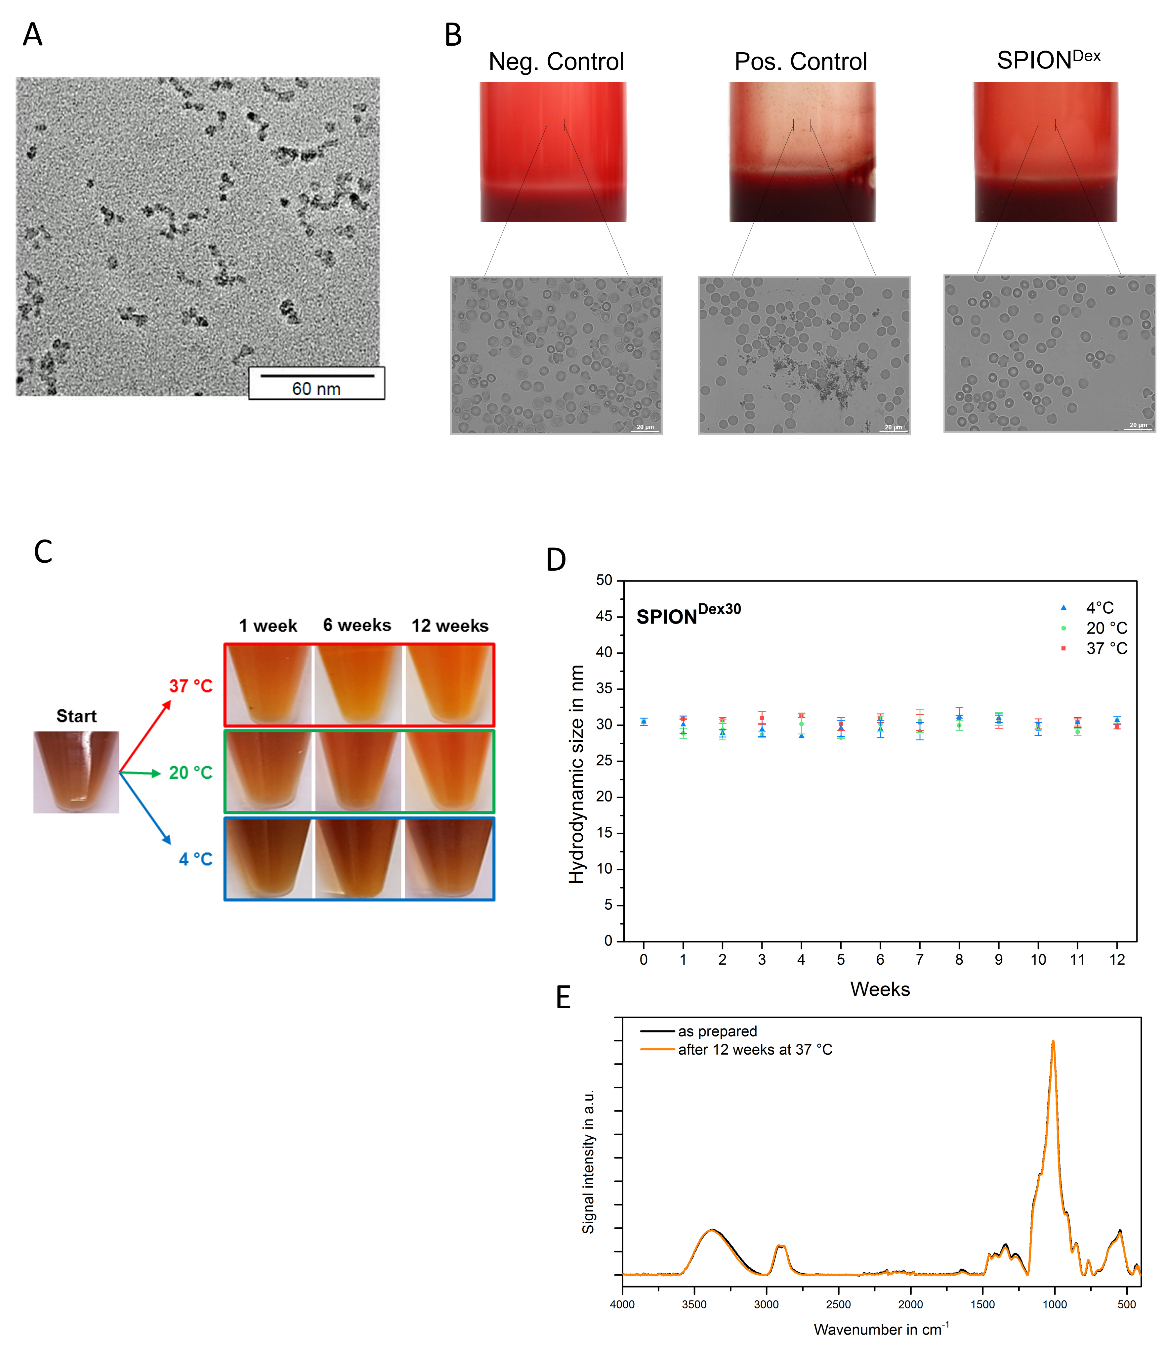


**Suppl. Figure 1** Characterization of SPIONDex [1, 2]. (A) Transmission electron microscopy image of SPIONDex. (B) Blood stability of SPIONDex in EDTA-anticoagulated rabbit whole blood. (C-E) Evaluation of SPIONDex storage stability at different temperatures for 12 weeks: (C) Storage temperature- and storage time-dependent color change of the particles; (D) Hydrodynamic size over the storage period; (E) FTIR spectra confirm lack of changes in surface chemistry (adapted from Unterweger et al. Int J Nanomed 2017 (A-B); Unterweger et al. Int J Nanomed 2018 (C-E)).

**Notes:** For blood stability assay, blood sample was mixed with SPIONDex to an iron concentration of 1 mg/mL and incubated for 45 min. Pos. Control lauric acid-coated SPIONs. Neg. Control: sample without nanoparticles.

D-E: Means ± SD of 3 independent experiments are shown.

**Abbreviations**: EDTA, ethylenediaminetetraacetic acid; SPIONDex, dextran-coated superparamagnetic iron oxide nanoparticles; FTIR, Fourier transform infrared spectroscopy.

**Suppl. Table 1** Summary and comparison of the contrast agent formulations’ different physicochemical properties [3].

| Property | SPIONDex | Ferumoxytol |
| --- | --- | --- |
| Hydrodynamic size (nm) | 35 ± 0.1 | 38 ± 0.2 |
| Polydispersity index (a.u.) | 0.129 ± 0.005 | 0.210 ± 0.001 |
| ζ-potential (mV) at pH 7.4 | -4 ± 0.3 | -40 ± 0.5 |
| Magnetic volume susceptibility normalized to iron concentration (mL/mg) | 9.0⋅10-4 ± 4⋅10-6 | 1.5⋅10-3 ± 3⋅10-7 |
| r1 (s-1mM-1) | 6 ± 0.4 | 6 ± 0.4 |
| r2 (s-1mM-1) | 66 ± 1.6 | 67 ± 1.7 |
| r2* (s-1mM-1) | 101 ± 3.0 | 98 ± 4.0 |

**Notes:** Table adapted from Unterweger et al. Int J Nanomed 2023

**Abbreviations**: SPIONDex, dextran-coated superparamagnetic iron oxide nanoparticles


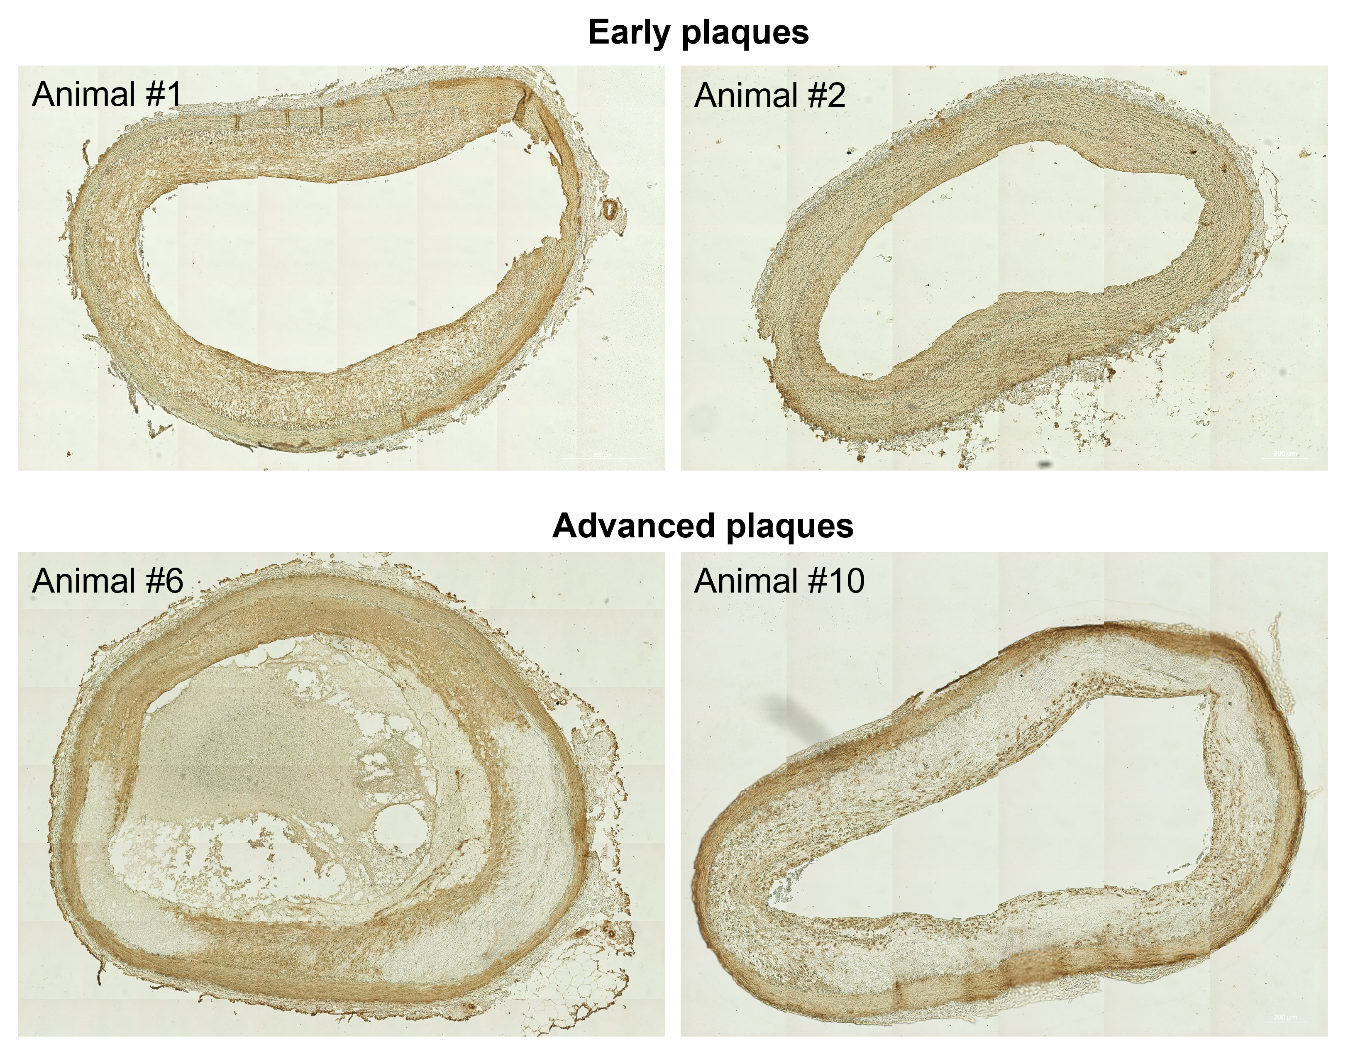


**Suppl. Figure 2** Immunohistochemical visualization of smooth muscle cells in early and advanced atherosclerotic plaques.

**Notes:** Rabbits were exposed to abdominal aorta ballooning, followed by HCD for 5 weeks. Afterwards, individual animals were fed normal chow for different amounts of time. Following sacrifice, their atherosclerotic specimens were analyzed by immunohistochemistry. The SMCs in atherosclerotic plaques were detected by using mouse monoclonal antibody against SMA (clone 1A4). Early plaques: 6-7 weeks after ballooning; Advanced plaques: >25 weeks from ballooning (the age of the plaque in weeks after ballooning for each animal is shown in Table 1).

**Abbreviations:** SMA, smooth muscle actin; SMCs, smooth muscle cells.


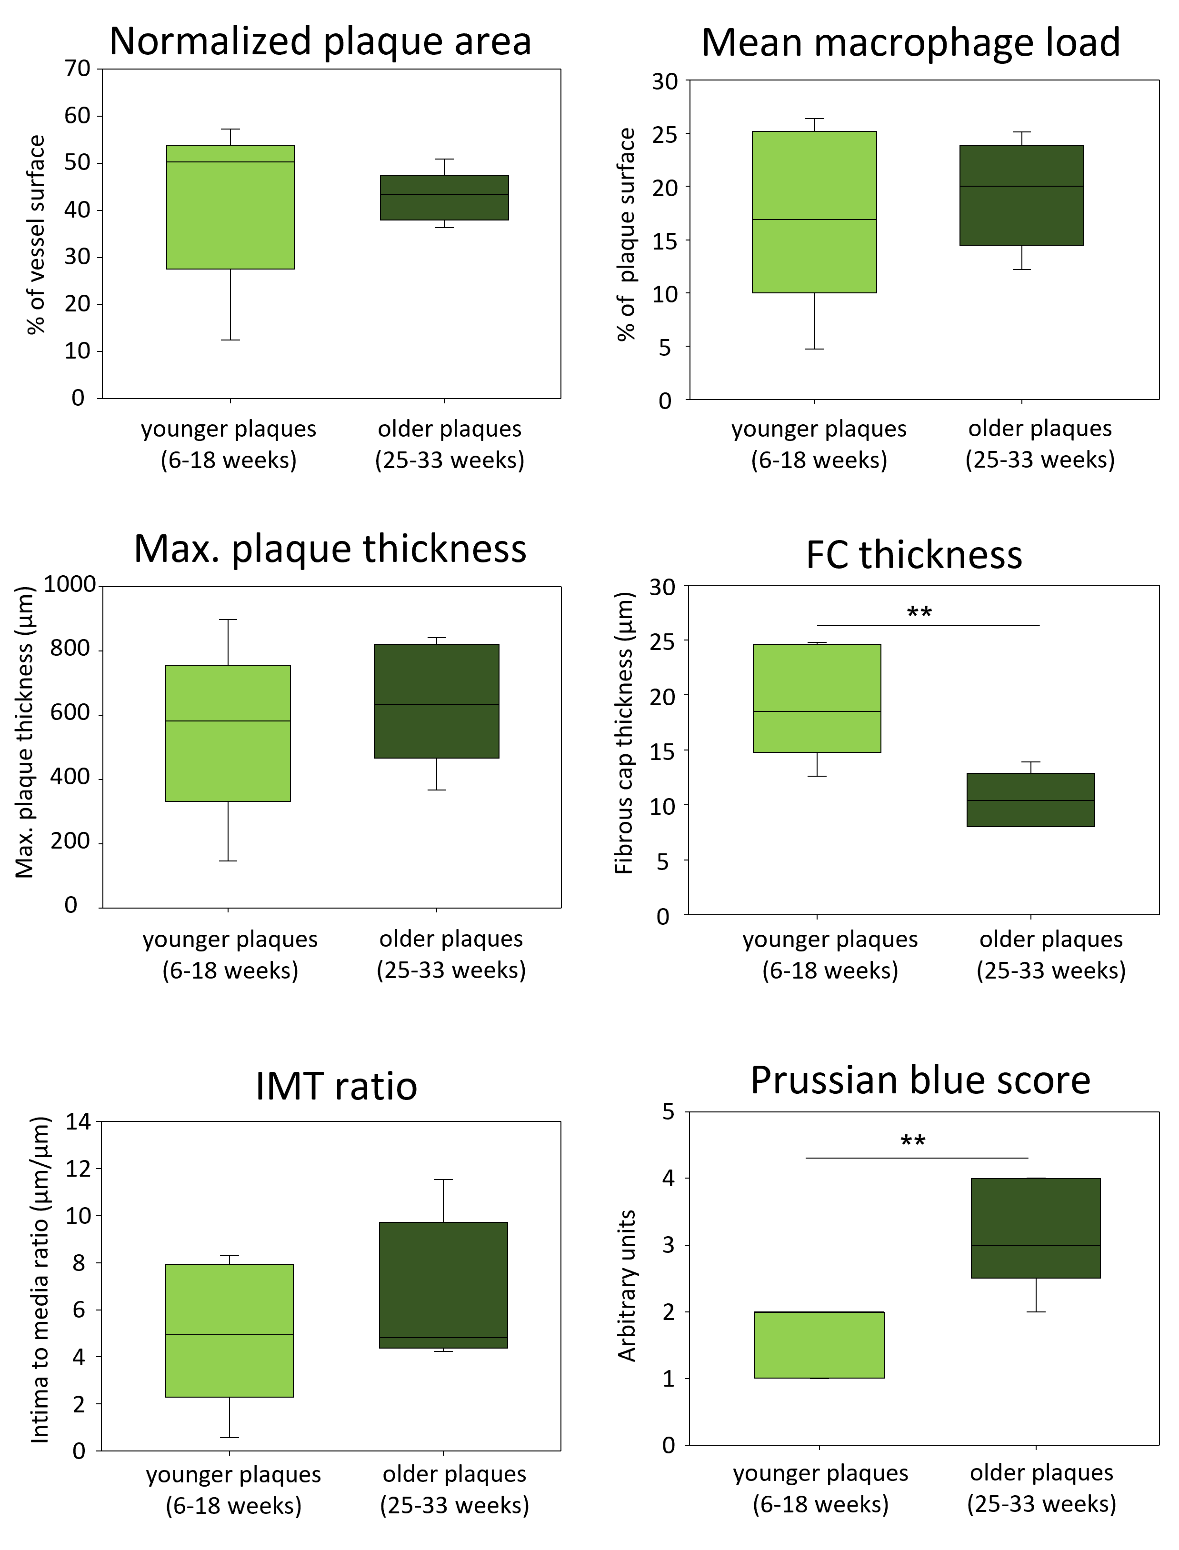


**Suppl. Figure 3** Comparison of plaque features in rabbits with younger and older plaques.

**Notes:** Rabbits were exposed to abdominal aorta ballooning, followed by HCD for 5 weeks. Afterwards, individual animals were fed normal chow for different amounts of time. Following SPION administration and MRI, animals were sacrificed and their atherosclerotic specimens were analyzed by histology/immunohistochemistry. The accumulation of SPIONs in atherosclerotic plaques was determined by Prussian blue staining. n=5 animals per group; ** P< 0.01 (t-test).

**Abbreviations:** FC, fibrous cap; IMT, intima:media thickness


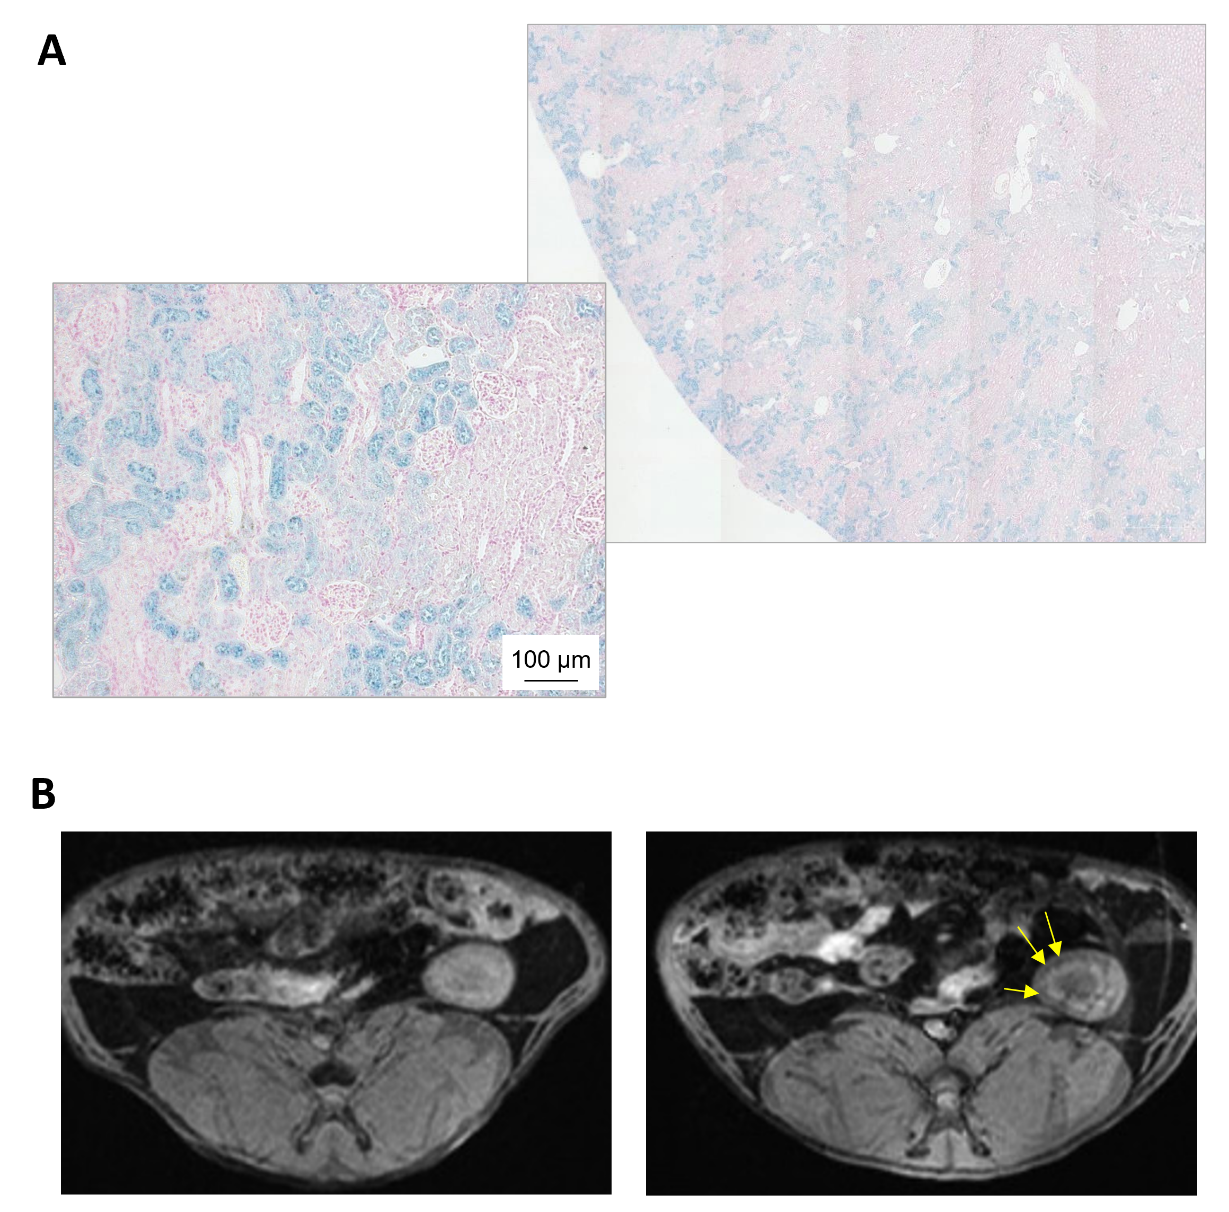


**Suppl. Figure 4** Iron accumulation in kidney of animal #3. (A) Histological detection of tissue iron using Prussian blue staining; (B) MRI images before (left) and 24 h after (right) SPIONDex administration. Arrows indicare the region visible in histological staining.

**Notes:** Rabbits were exposed to abdominal aorta ballooning, followed by HCD for 5 weeks. Afterwards, individual animals were fed normal chow for different amounts of time. Following SPION administration and MRI, animals were sacrificed and the organs were collected to determine accumulation of SPIONs using Prussian blue staining.

**Abbreviations:** HCD, high-cholesterol diet; MRI, magnetic resonance imaging; SPION, superparamagnetic iron oxide nanoparticles.

**References**

1. Unterweger H, Janko C, Schwarz M *et al*. Non-immunogenic dextran-coated superparamagnetic iron oxide nanoparticles: a biocompatible, size-tunable contrast agent for magnetic resonance imaging*.* *International Journal of Nanomedicine* 12 5223-5238 (2017).

2. Unterweger H, Dezsi L, Matuszak J *et al*. Dextran-coated superparamagnetic iron oxide nanoparticles for magnetic resonance imaging: evaluation of size-dependent imaging properties, storage stability and safety*.* *International Journal of Nanomedicine* 13 1899-1915 (2018).

3. Unterweger H, Janko C, Folk T *et al*. Comparative in vitro and in vivo evaluation of different iron oxide-based contrast agents to promote clinical translation in compliance with patient safety*.* *Int J Nanomedicine* in press (2023).
